# Supplementary material for: Application and Performance of Artificial Intelligence Technology in Oral Cancer Diagnosis and Prediction of Prognosis: A Systematic Review
Source: MDPI journal article supplement (doi:10.3390/diagnostics11061004), 2021-05-31
Supplement: s1 [file s1]

**Table S1.** Quality assessment (QUADAS 2) summary of the risk of bias.

|                       | PATIENT SELECTION | INDEX TEST | REFERENCE STANDARD | FLOW AND TIMING |
|-----------------------|-------------------|------------|--------------------|-----------------|
| Nayak et al [1]       | Low               | Low        | Low                | Low             |
| Rosma et al [2]       | Low               | Low        | High               | Low             |
| Tseng et al [3]       | Low               | Low        | Low                | Low             |
| Uthoff et al [4]      | Low               | Low        | High               | Low             |
| Shams et al [5]       | Unclear           | Low        | Unclear            | Unclear         |
| Alabi et al [6]       | Low               | Low        | Low                | Low             |
| Sunny et al [7]       | Low               | Low        | High               | Unclear         |
| Jeyaraj et al [8]     | Low               | Low        | Unclear            | Low             |
| Kim et al [9]         | Low               | Low        | Low                | Low             |
| Alhazmi et al [10]    | Low               | Low        | Low                | Low             |
| Chu et al. [11]       | Low               | Low        | Low                | Low             |
| Jubair et al. [12]    | Low               | Low        | Low                | Low             |
| Musulin et al [13]    | Low               | Low        | High               | Low             |
| Rathod et al. [14]    | Unclear           | Low        | Unclear            | Unclear         |
| Lavanya et al. [15]   | Unclear           | Low        | High               | Unclear         |
| Kirubabai et al. [16] | Unclear           | Low        | High               | Unclear         |
| Karadaghy et al. [17] | Low               | Low        | Low                | Low             |

**Table S2.** Quality assessment (QUADAS 2) summary of applicability concerns.

|                       | PATIENT SELECTION | INDEX TEST | REFERENCE STANDARD |
|-----------------------|-------------------|------------|--------------------|
| Nayak et al [1]       | High              | Low        | Low                |
| Rosma et al [2]       | Unclear           | Unclear    | High               |
| Tseng et al [3]       | Low               | Low        | Low                |
| Uthoff et al [4]      | Low               | Low        | High               |
| Shams et al [5]       | Unclear           | Low        | Unclear            |
| Alabi et al [6]       | Low               | Low        | Low                |
| Sunny et al [7]       | Unclear           | Unclear    | High               |
| Jeyaraj et al [8]     | Low               | Low        | Unclear            |
| Kim et al [9]         | Low               | Low        | Low                |
| Alhazmi et al [10]    | Low               | Low        | Low                |
| Chu et al. [11]       | Low               | Low        | Low                |
| Jubair et al. [12]    | Low               | Low        | Low                |
| Musulin et al [13]    | Low               | Low        | High               |
| Rathod et al. [14]    | Unclear           | Low        | Unclear            |
| Lavanya et al. [15]   | Unclear           | Low        | High               |
| Kirubabai et al. [16] | Unclear           | Low        | High               |
| Karadaghy et al. [17] | Low               | Low        | Low                |

## References

1. Nayak, G.S.; Kamath, S.; Pai, K.M.; Sarkar, A.; Ray, S.; Kurien, J.; D'Almeida, L.; Krishnanand, B.R.; Santhosh, C.; Kartha, V.B.; et al. Principal component analysis and artificial neural network analysis of oral tissue fluorescence spectra: Classification of normal premalignant and malignant pathological conditions. *Biopolymers* **2006**, *82*, 152–166, doi:10.1002/bip.20473.
2. Rosma, M.D.; Sameem, A.K.; Basir, A.; Siti Mazlipah, I.; Norzaidi, M.D. The use of artificial intelligence to identify people at risk of oral cancer: Empirical evidence in Malaysian university. *Int. J. Sci. Res. Educ.* **2010**, *3*, 10–20.
3. Tseng, W.T.; Chiang, W.F.; Liu, S.Y.; Roan, J.; Lin, C.N. The Application of Data Mining Techniques to Oral Cancer Prognosis. *J. Med. Syst.* **2015**, *39*, 59–66, doi:10.1007/s10916-015-0241-3.
4. Uthoff, R.D.; Song, B.; Sunny, S.; Patrick, S.; Suresh, A.; Kolar, T.; Keerthi, G.; Spires, O.; Anbarani, A.; Wilder-Smith, P.; et al. Point-of-care, smartphone-based, dual-modality, dual-view, oral cancer screening device with neural network classification for low-resource communities. *PLoS ONE* **2018**, *13*, 1–21, doi:10.1371/journal.pone.0207493.
5. Shams, W.K.; Htike, Z.Z. Oral Cancer Prediction Using Gene Expression Profiling and Machine Learning. *Int. J. Appl. Eng. Res.* **2017**, *12*, 4893–4898.
6. Alabi, R.O.; Elmusrati, M.; Sawazaki-Calone, I.; Kowalski, L.P.; Haglund, C.; Coletta, R.D.; Mäkitie, A.A.; Salo, T.; Almangush, A.; Leivo, I. Comparison of supervised machine learning classification techniques in prediction of locoregional recurrences in early oral tongue cancer. *Int. J. Med. Inform.* **2020**, *136*, 104068, doi:10.1016/j.ijmedinf.2019.104068.
7. Sunny, S.; Baby, A.; James, B.L.; Balaji, D.; N. V., A.; Rana, M.H.; Gurpur, P.; Skandarajah, A.; D'Ambrosio, M.; Ramanjinappa, R.D.; et al. A smart tele-cytology point-of-care platform for oral cancer screening. *PLoS ONE* **2019**, *14*, 1–16, doi:10.1371/journal.pone.0224885.
8. Jeyaraj, P.R.; Samuel Nadar, E.R. Computer-assisted medical image classification for early diagnosis of oral cancer employing
9. Kim, D.W.; Lee, S.; Kwon, S.; Nam, W.; Cha, I.H.; Kim, H.J. Deep learning-based survival prediction of oral cancer patients. *Sci. Rep.* **2019**, *9*, 1–10, doi:10.1038/s41598-019-43372-7.
10. Alhazmi, A.; Alhazmi, Y.; Makrami, A.; Masmali, A.; Salawi, N.; Masmali, K.; Patil, S. Application of artificial intelligence and machine learning for prediction of oral cancer risk. *J. Oral Pathol. Med.* **2021**, 1–7, doi:10.1111/jop.13157.
11. Chu, C.S.; Lee, N.P.; Adeoye, J.; Thomson, P.; Choi, S. Machine learning and treatment outcome prediction for oral cancer. *J. Oral Pathol. Med.* **2020**, *49*, 977–985, doi:10.1111/jop.13089.
12. Jubair, F.; Al-karadsheh, O.; Malamos, D.; Al Mahdi, S.; Saad, Y.; Hassona, Y. A novel lightweight deep convolutional neural network for early detection of oral cancer. *Oral Dis.* **2021**, *00*, 1–8, doi:10.1111/odi.13825.
13. Musulin, J.; Štifanić, D.; Zulijani, A.; Čabov, T.; Dekanić, A.; Car, Z. An enhanced histopathology analysis: An ai-based system for multiclass grading of oral squamous cell carcinoma and segmenting of epithelial and stromal tissue. *Cancers* **2021**, *13*, 1784, doi:10.3390/cancers13081784.
14. Rathod, J.; Sherkay, S.; Bondre, H.; Sonewane, R.; Deshmukh, D. Oral Cancer Detection and Level Classification Through Machine Learning. *Int. J. Adv. Res. Comput. Commun. Eng.* **2020**, *9*, 177–182, doi:10.17148/IJARCCCE.2020.9335.
15. Lavanya L.; Chandra, J. Oral Cancer Analysis Using Machine Learning Techniques. *Int. J. Eng. Res. Technol.* **2019**, *12*, 596–601.
16. Kirubabai, M.P.; Arumugam, G. View of Deep Learning Classification Method to Detect and Diagnose the Cancer Regions in Oral MRI Images. *Med. Legal Update* **2021**, *21*, 462–468.
17. Karadaghy, O.A.; Shew, M.; New, J.; Bur, A.M. Development and Assessment of a Machine Learning Model to Help Predict Survival among Patients with Oral Squamous Cell Carcinoma. *JAMA Otolaryngol. Head Neck Surg.* **2019**, *145*, 1115–1120, doi:10.1001/jamaoto.2019.0981.
